# Supplementary material
Source: PubMed Central journal article supplement (PMC3409288)
Supplement: 11_498_Uccelli.Suppl.pdf [file 11_498_Uccelli.Suppl.pdf]

## Supplemental Data

# Intravenous Mesenchymal Stem Cells Improve Survival and Motor Function in Experimental Amyotrophic Lateral Sclerosis

Antonio Uccelli,<sup>1,2,3</sup> Marco Milanese,<sup>4\*</sup> Maria Cristina Principato,<sup>1\*</sup> Sara Morando,<sup>1,3</sup> Tiziana Bonifacino,<sup>4</sup> Laura Vergani,<sup>5</sup> Debora Giunti,<sup>1</sup> Adriana Voci,<sup>5</sup> Enrico Carminati,<sup>5</sup> Francesco Giribaldi,<sup>4</sup> Claudia Caponnetto,<sup>1</sup> and Giambattista Bonanno<sup>2,4,6</sup>

Online address: <http://www.molmed.org>

The Feinstein Institute  
for Medical Research 

**Supplementary Table S1.** Parameters utilized to score hind limb extension reflex and gait, as indexes of pathology progression.

| <b>HIND LIMBS EXTENSION REFLEX (mice suspended by the tail)</b> |                                                                                                        |
|-----------------------------------------------------------------|--------------------------------------------------------------------------------------------------------|
| 5                                                               | normal functions, no signs of disease                                                                  |
| 4.5                                                             | slight limb extension deficits                                                                         |
| 4                                                               | minor limb asymmetry; slight tremor                                                                    |
| 3.5                                                             | moderate extension asymmetry or bilateral extension deficit; tremor                                    |
| 3                                                               | evident extension asymmetry or bilateral extension deficit; first signs of paralysis; severe tremor    |
| 2.5                                                             | pronounced extension incapability; partial paralysis of one or both limbs; first signs of arched spine |
| 2                                                               | severe extension incapability or persistent limb elongation                                            |
| 1.5                                                             | nearly total paralysis with still autonomous movements; persistent limb elongation                     |
| 1                                                               | modest limb movements after touch stimulation; accentuated arched spine                                |
| 0.5                                                             | total paralysis of both limbs; no limb movements after touch stimulation                               |
| 0                                                               | total paralysis (euthanasia)                                                                           |
| <b>GAIT (mice walking in open space)</b>                        |                                                                                                        |
| 5                                                               | normal straight gait, no signs of disease                                                              |
| 4.5                                                             | slight stagger gait                                                                                    |
| 4                                                               | evident stagger gait                                                                                   |
| 3.5                                                             | wobbling but straight gait; first signs of hind limb motor activity impairment                         |

*Continued*

**Supplementary Table S1. Continued.**

|     |                                                                                                                 |
|-----|-----------------------------------------------------------------------------------------------------------------|
| 3   | evident signs of one or both hind limbs motor activity impairment                                               |
| 2.5 | severe tremor; walking on tiptoes                                                                               |
| 2   | partial dragging gait using forelimbs; stiffness of one or both hind limbs                                      |
| 1.5 | dragging gait mostly using forelimbs                                                                            |
| 1   | dragging gait using forelimbs only because of total paralysis of both hind limbs; still straight gait direction |
| 0.5 | signs of forelimb impairment; turning around gait                                                               |
| 0   | the animal is unable to move (euthanasia)                                                                       |

**Supplementary Table S2.** Primers utilized for quantitative real-time RT-PCR experiments.

|                     |                                 |
|---------------------|---------------------------------|
| MT1 forward         | 5'-CTGCTCCACCGGCGG-3'           |
| MT1 reverse         | 5'-GCCCTGGGCACATTGG-3'          |
| MT2 forward         | 5'-TCCTGT GCCACAGATGGATC-3'     |
| MT2 reverse         | 5'-GTCCGAAGCCTCTTTGCAGA-3'      |
| MT3 forward         | 5'-GGAGGAACCAAGCTACGGC-3'       |
| MT3 reverse         | 5'-ACATAGGCTGTGTGGGAGGG-3'      |
| iNOS forward        | 5'-TGAACCTTGAGCGAGGAGCA-3'      |
| iNOS reverse        | 5'-TTCATGATAACGTTCTGGCTCT-3'    |
| CX3CR1 forward      | 5'-AAGTCCCTTCCCCTCTGCT-3'       |
| CX3CR1 reverse      | 5'-CAAAATTCTCTAGATCCAGTTCAGG-3' |
| IGF-1 forward       | 5'-AGCAGCCTTCCAACCTCAATTAT-3'   |
| IGF-1 reverse       | 5'-GAAGACGACATGATGTATCTTTATC-3' |
| Nurr1 forward       | 5'-TCAGAGCCCACGTCGATT-3'        |
| Nurr1 reverse       | 5'-TAGTCAGGGTTTGCCTGGAA-3'      |
| GLT-1 forward       | 5'-CATCCTTGCTGCTTATATGGC-3'     |
| GLT-1 reverse       | 5'-GTTTCTGTTCCCTTCTCACC-3'      |
| IL1 $\beta$ forward | 5'-AGTTGACGGACCCCAAAAG-3'       |
| IL1 $\beta$ reverse | 5'-TTTGAAGCTGGATGCTCTCAT-3'     |
| TNF forward         | 5'-TCTTCTCATTCTGCTTG-3'         |
| TNF reverse         | 5'-GGTCTGGCCATAGAACTGA-3'       |

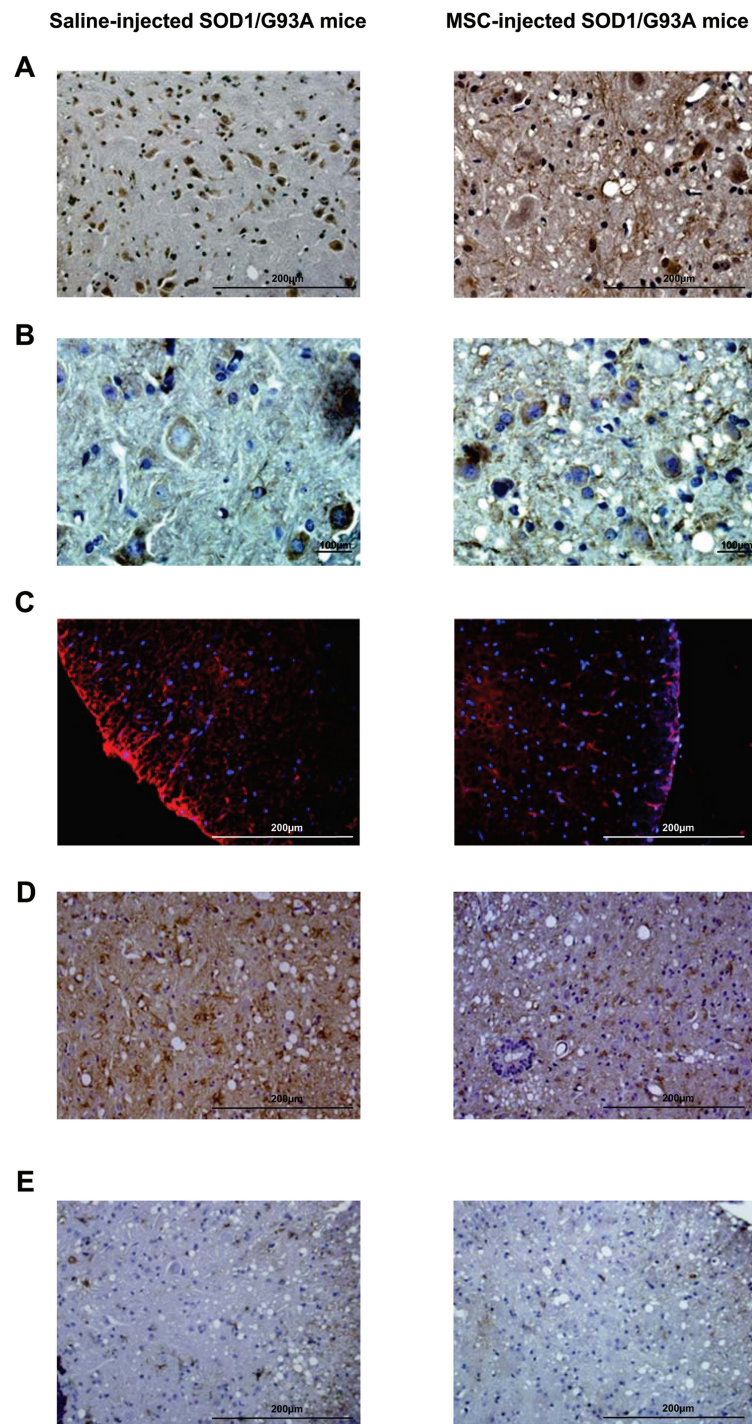

**Supplementary Figure S1.** Spinal cord images representative of the data shown in Fig 4 and 5. The following proteins were stained: (A) ubiquitin, (B) ChAT, (C) GLT-1, (D) GFAP, (E) IB4. SOD1/G93A mice were treated with  $10^6$  MSCs at d 90 or saline and sacrificed at d 125 and transcardially perfused with 4% paraformaldehyde. The spinal cord was removed, post-fixed, and embedded in paraffin and 5  $\mu$ m sections were stained for histological examination. The following antibodies were used: mouse anti-ubiquitin, diluted 1:250; rabbit anti-ChAT, diluted 1:500; guinea pig anti-GLT-1, diluted 1:100; rabbit anti-cow GFAP, diluted 1:100; isolectin IB4 conjugated antibody, diluted 1:100. Scale bars: 200  $\mu$ m (A, C–D); 100  $\mu$ m (B).

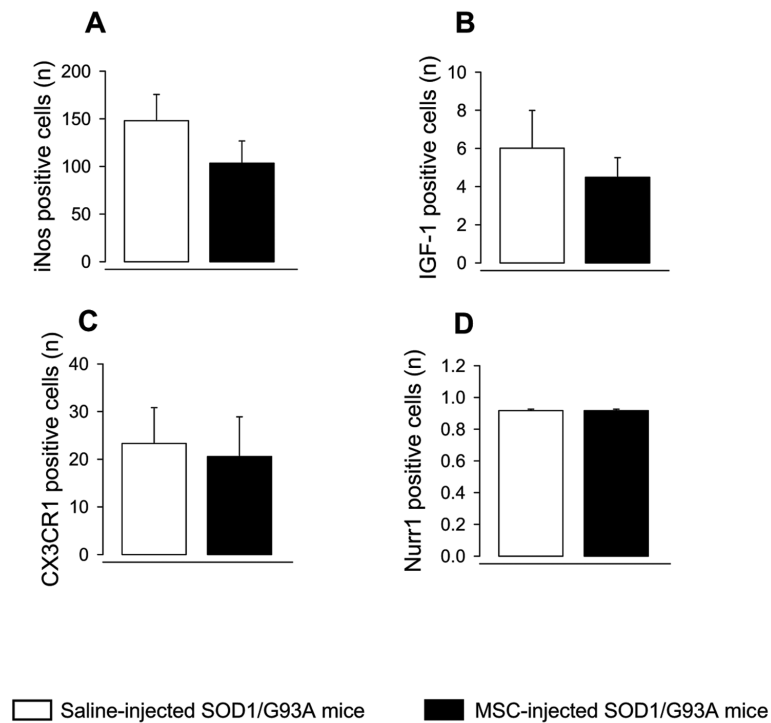

**Supplementary Figure S2.** Effects of MSC administration on the number of (A) iNOS-, (B) IGF-1-, (C) CX3CR1-, and (D) Nurr1-positive cells in the spinal cord of SOD1/G93A mice. SOD1/G93A mice were treated with  $10^6$  MSCs or saline at d 90 and sacrificed at d 125 and transcardially perfused with 4% paraformaldehyde. Spinal cord was removed, post-fixed, and embedded in paraffin. Five  $\mu$ m sections were stained for histological examination. The following antibodies were used: rabbit anti-iNOS, diluted 1:100; rabbit anti-IGF1, diluted 1:200; rabbit anti-CX3CR1, diluted 1:100; anti-human/mouse Nurr1, diluted 1:200. Quantification was performed on 6 sections per animal (7 animals per group) from three segments apart. Data (means  $\pm$  SEM) represent the number of positive cells/mm<sup>2</sup>.

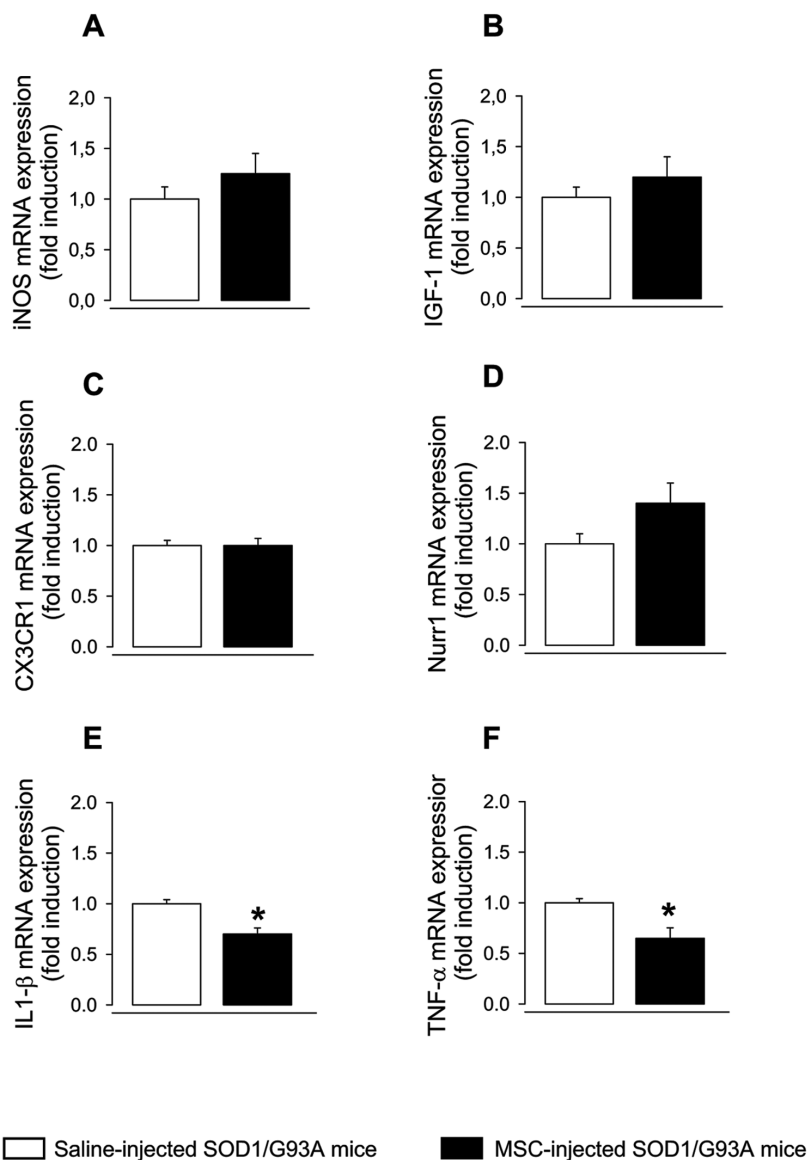

**Supplementary Figure S3.** Effect of MSC administration on (A) iNOS, (B) IGF-1, (C) CX3CR1, (D) Nurr1, (E) IL1 $\beta$  and (F) TNF $\alpha$  mRNA expression in the spinal cord of SOD1/G93A mice. SOD1/G93A mice were treated with  $10^6$  MSCs or saline at d 90 and sacrificed at d 125. mRNAs were analyzed by RT-PCR. Six mice per group were used. Data (means  $\pm$  SEM) are expressed as fold induction respect to saline-injected SOD1/G93A mice. (\*  $p < 0.01$ , Mann-Whitney).
